# Supplementary material for: Large Area Crop Inventory Experiment (LACIE). Signature extension in remote sensing
Source: Royal Society of Chemistry journal article supplement (doi:10.1039/d3tb00254c), 1979-04-01
Supplement: d3tb00254c1.pdf [file d3tb00254c1.pdf]

## Carbon dot decorated $\text{Co}_3\text{O}_4$ nanozymes responsive to NIR-II window for mild photothermal-enhanced nanocatalytic therapy

Nan Wang,<sup>†ab</sup> Tong Dong,<sup>†c</sup> Wenjing Shi,<sup>†e</sup> Li-an Li,<sup>b</sup> Ming-xia Ye,<sup>d</sup> Xiao-yu Fu,<sup>d</sup> Zhi-feng Yan,<sup>\*d</sup>  
Yuan-guang Meng<sup>\*d</sup>

<sup>a</sup> Medicine School of Chinese PLA, Beijing 100853, China

<sup>b</sup> Department of Obstetrics and Gynecology, the First Medical Center, Chinese PLA General Hospital, Beijing 100853, China

<sup>c</sup> Department of Obstetrics and Gynecology, the Six Medical Center, Chinese PLA General Hospital, Beijing 100037, China

<sup>d</sup> Faculty of Obstetrics and Gynecology, the Seventh Medical Center, Chinese PLA General Hospital, Beijing 100007, China

<sup>e</sup> Department of Navel Nutrition and Food Hygiene, Faculty of Naval Medicine, Naval Medical University, Shanghai, 200233, China

E-mail: yanzhifeng2002@163.com (Z. Yan), meng6512@vip.sina.com (Y. Meng)

<sup>†</sup> These authors contributed equally to this paper.

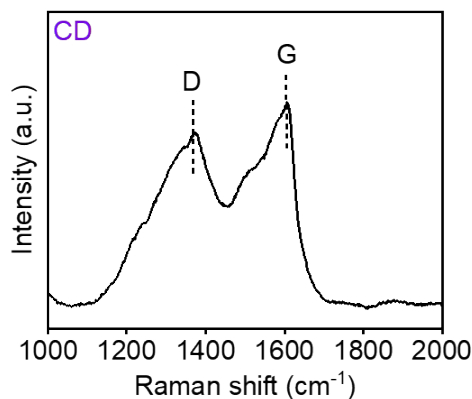

**Figure S1.** Raman spectrum of CD nanozymes.

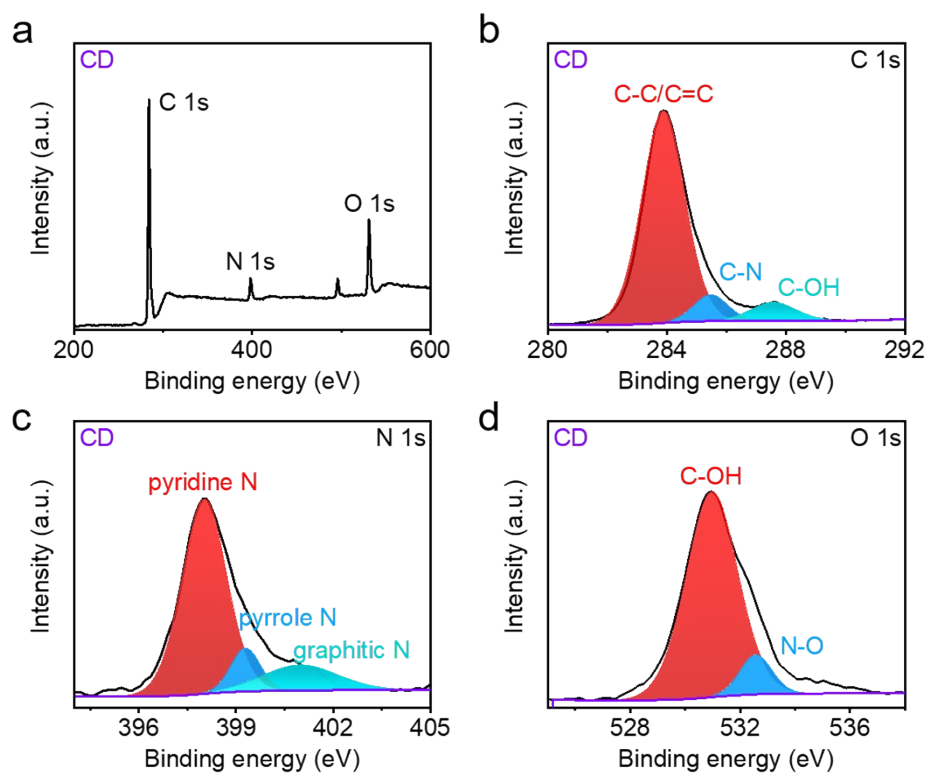

**Figure S2.** The survey XPS (a), high-resolution C 1s (b), N 1s (c), and O 1s (d) spectra of CDs.

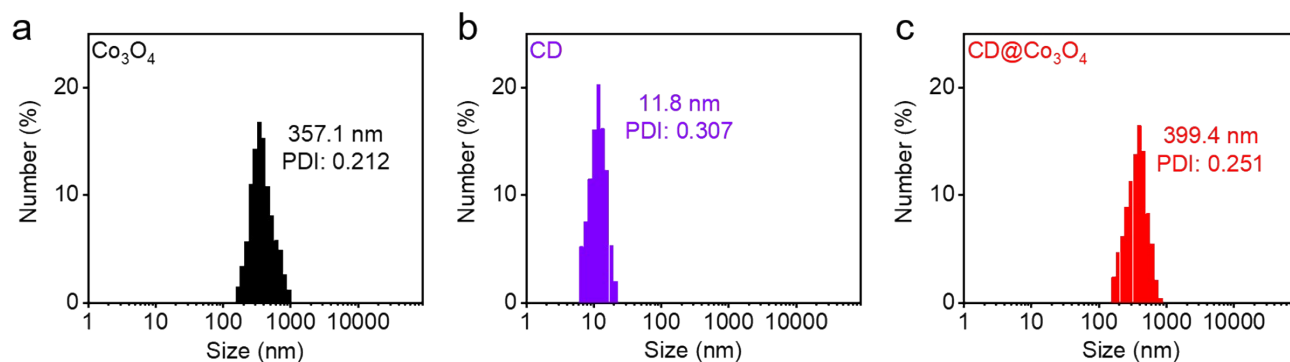

**Figure S3.** The hydrodynamic diameter of  $\text{Co}_3\text{O}_4$  (a), CDs (b), and  $\text{CD}@Co_3O_4$  (c).

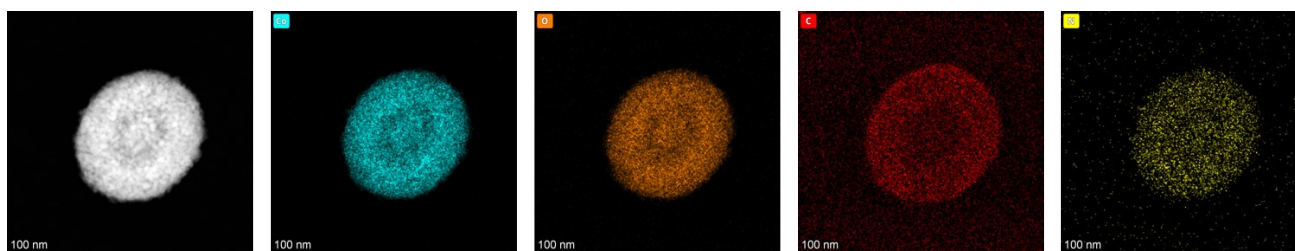

**Figure S4.** Element mapping images of  $\text{CD}@Co_3O_4$ .

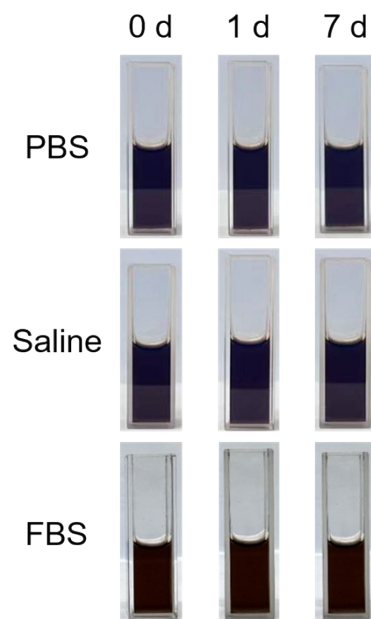

**Fig. S5.** Photographs of CD@Co<sub>3</sub>O<sub>4</sub> PBS solution, saline solution, and FBS solution stored for different periods of time (0, 1d, and 7 d).

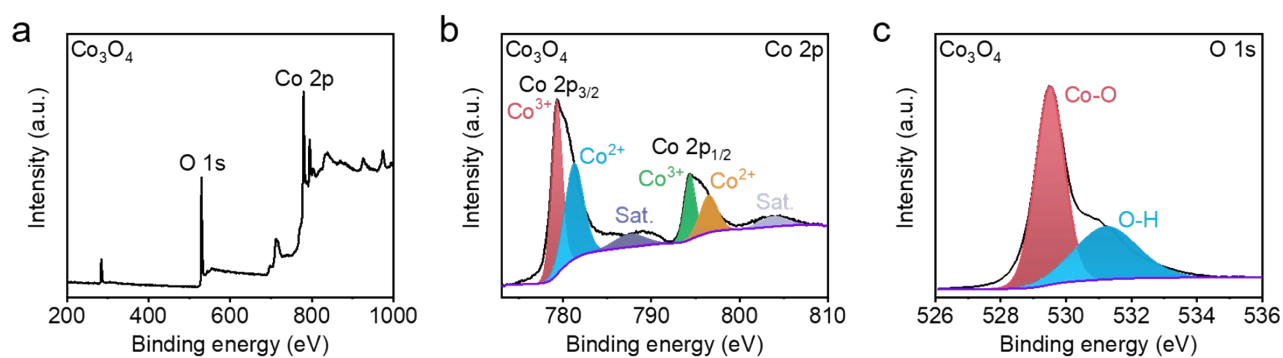

**Figure S6.** The survey XPS (a), high-resolution Co 2p (b), and O 1s (c) spectra of Co<sub>3</sub>O<sub>4</sub>.

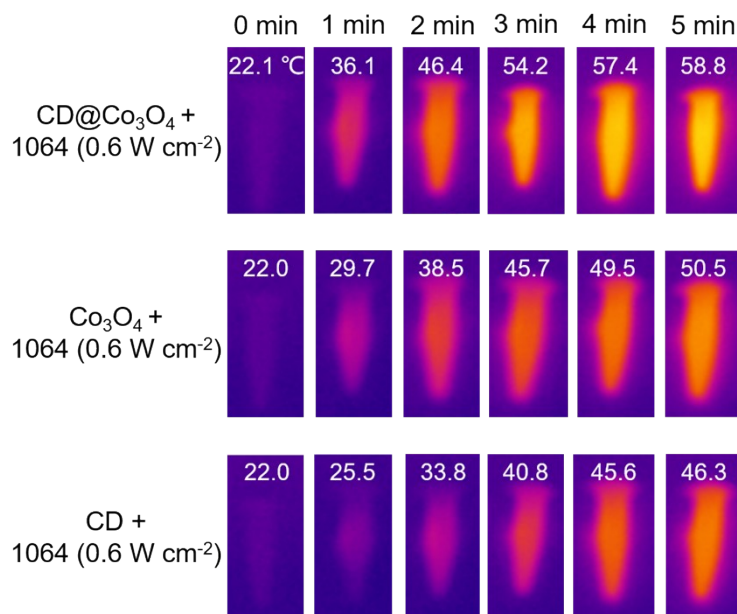

**Figure S7.** The NIR-II thermographic images of CD,  $\text{Co}_3\text{O}_4$ , and  $\text{CD@Co}_3\text{O}_4$ .

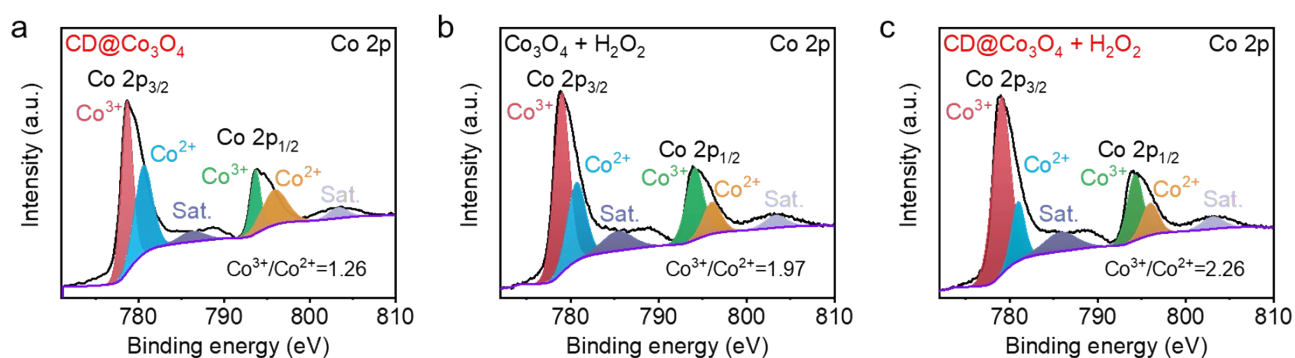

**Figure S8.** (a) High-resolution Co 2p XPS spectrum of  $\text{CD@Co}_3\text{O}_4$ . (b, c) High-resolution Co 2p XPS spectrum of  $\text{Co}_3\text{O}_4$  (b) and  $\text{CD@Co}_3\text{O}_4$  (c) incubated with  $\text{H}_2\text{O}_2$ .

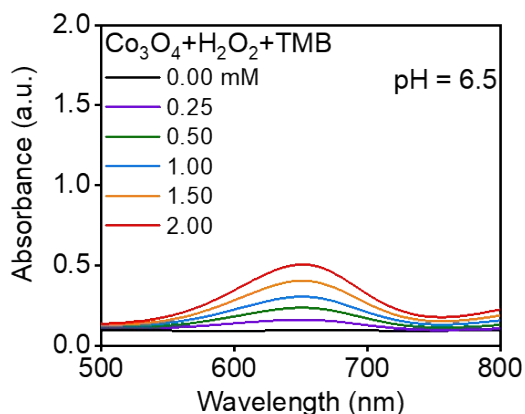

**Figure S9.** Absorption spectra of the oxidized TMB catalyzed by  $\text{Co}_3\text{O}_4$  at pH 6.5.

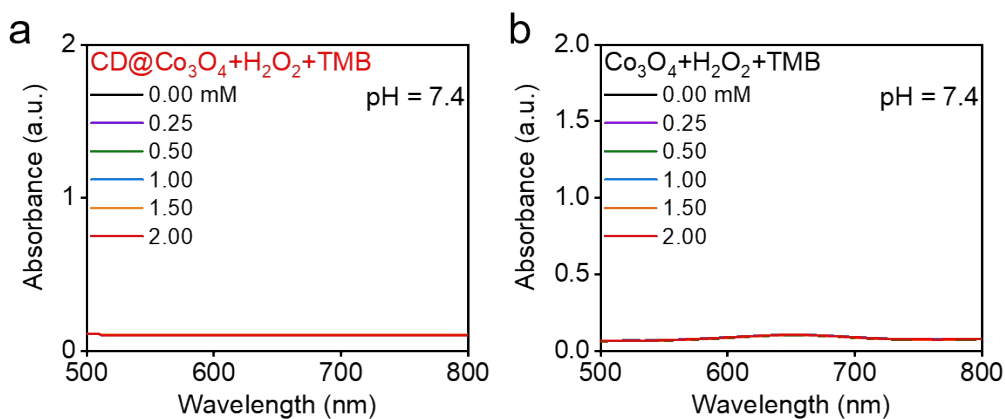

**Figure S10.** Absorption spectra of the oxidized TMB catalyzed by CD@Co<sub>3</sub>O<sub>4</sub> (a) or Co<sub>3</sub>O<sub>4</sub> (b) at pH 7.4.

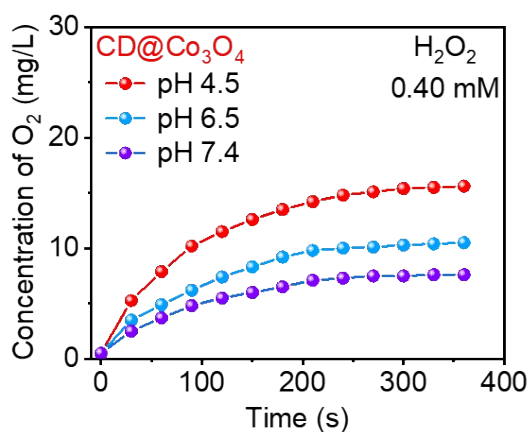

**Figure S11.** O<sub>2</sub> generation upon the addition of CD@Co<sub>3</sub>O<sub>4</sub> and H<sub>2</sub>O<sub>2</sub> (0.40 mM) at varied pH (4.5, 6.5, or 7.4).

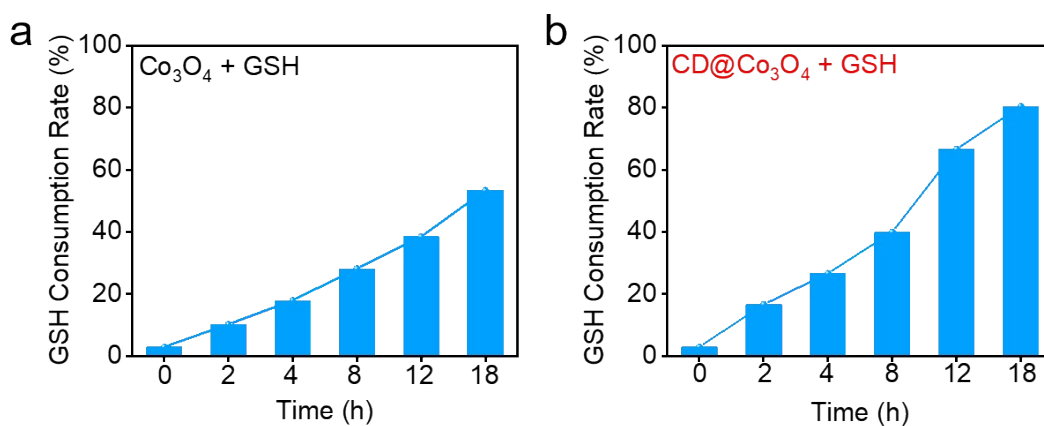

**Figure S12.** The GSH depletion activity evaluation of Co<sub>3</sub>O<sub>4</sub> (a) and CD@Co<sub>3</sub>O<sub>4</sub> (b).

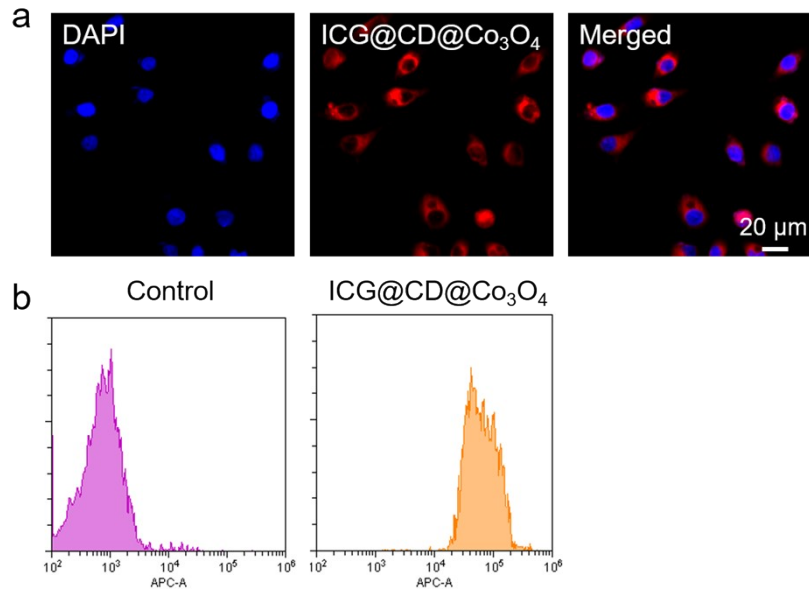

**Figure S13.** (a) Confocal images of HeLa cells treated with ICG labeled CD@Co<sub>3</sub>O<sub>4</sub>. (b) Cellular uptake of ICG labeled CD@Co<sub>3</sub>O<sub>4</sub> determined by flow cytometry.

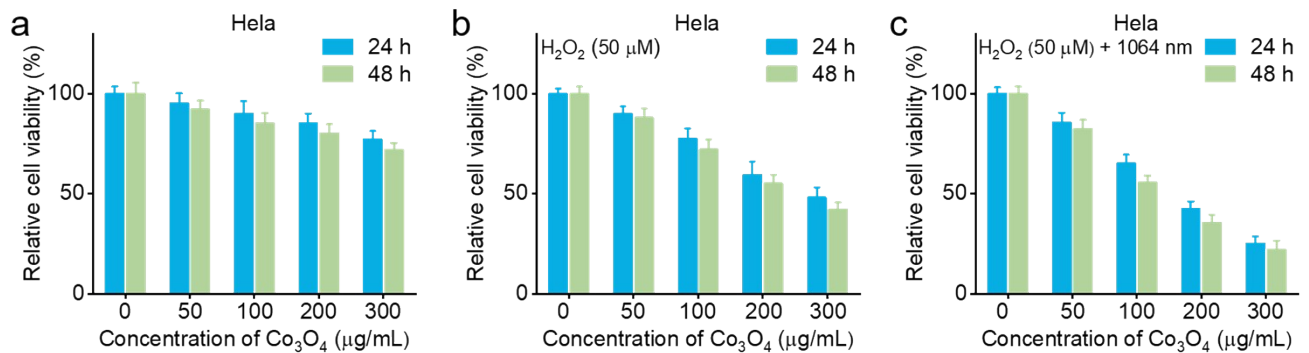

**Figure S14.** (a) Cell viability of and HeLa cells treated with Co<sub>3</sub>O<sub>4</sub> at varied concentrations (0-300 μg/mL). (b) Cell viability of and HeLa cells treated with Co<sub>3</sub>O<sub>4</sub> at varied concentrations (0-300 μg/mL) with the addition of H<sub>2</sub>O<sub>2</sub> (50 μM). (c) Cell viability of and HeLa cells treated with Co<sub>3</sub>O<sub>4</sub> at varied concentrations (0-300 μg/mL) with the addition of H<sub>2</sub>O<sub>2</sub> (50 μM) under the mild NIR-II laser treatments.

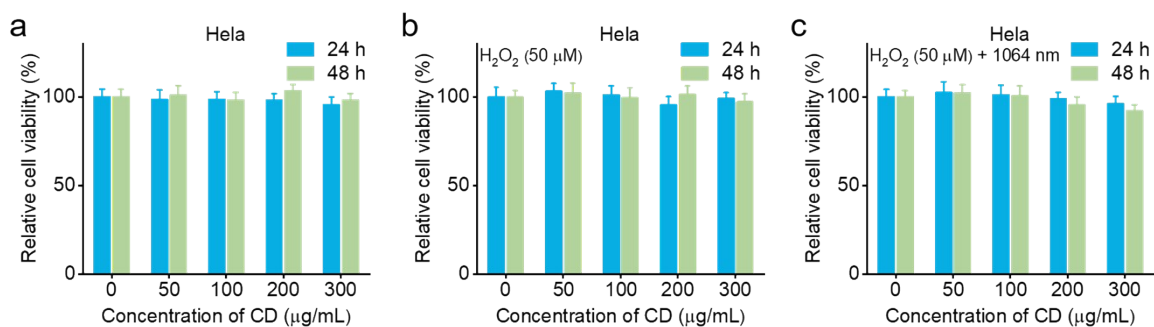

**Figure S15.** (a) Cell viability of and HeLa cells treated with CDs at varied concentrations (0-300

$\mu\text{g/mL}$ ). (b) Cell viability of and Hela cells treated with CDs at varied concentrations (0-300  $\mu\text{g/mL}$ ) with the addition of  $\text{H}_2\text{O}_2$  (50  $\mu\text{M}$ ). (c) Cell viability of and Hela cells treated with CDs at varied concentrations (0-300  $\mu\text{g/mL}$ ) with the addition of  $\text{H}_2\text{O}_2$  (50  $\mu\text{M}$ ) under the mild NIR-II laser treatments.

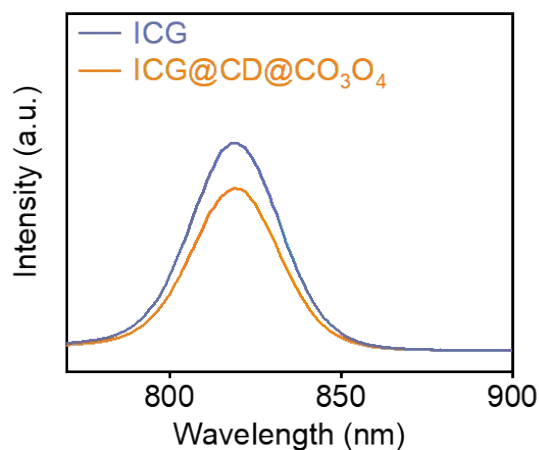

**Fig. S16.** NIR fluorescence spectrum of ICG and ICG@CD@Co<sub>3</sub>O<sub>4</sub>.

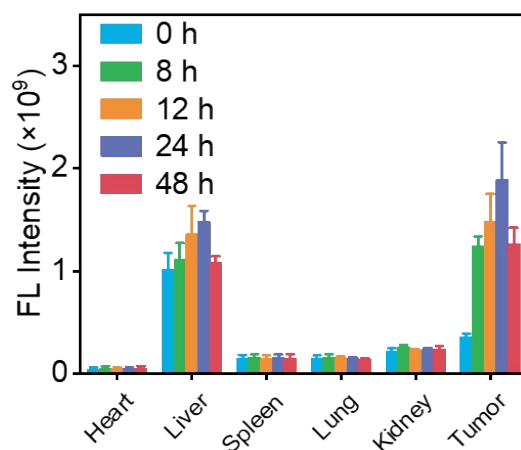

**Figure S17.** Time-dependent NIR fluorescence intensity of ICG-labeled CD@Co<sub>3</sub>O<sub>4</sub> in the major organs and tumor tissues based on the fluorescence imaging results.

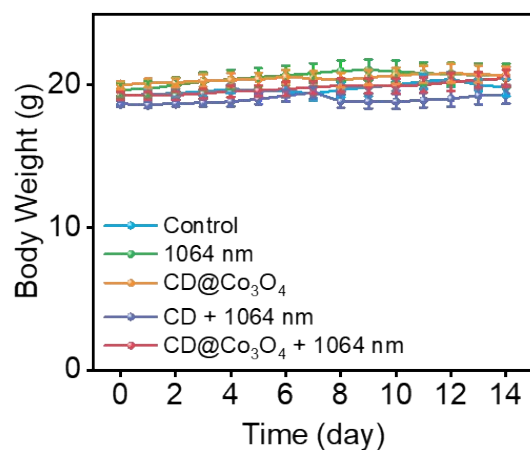

**Figure S18.** The body weight curves of the treated mice after different treatments (n=5).

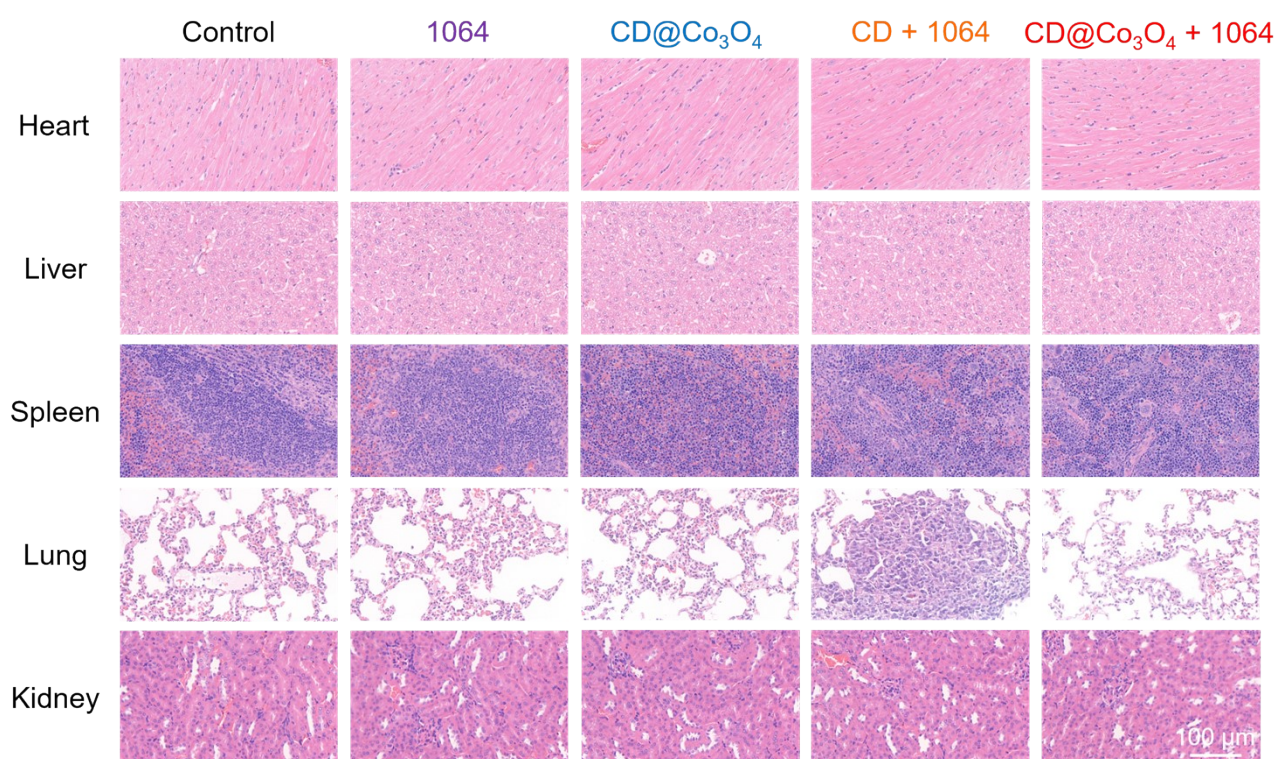

**Figure S19.** H&E-stained images obtained from the major organs (heart, liver, spleen, lung, and kidney) of mice in different treatment groups.



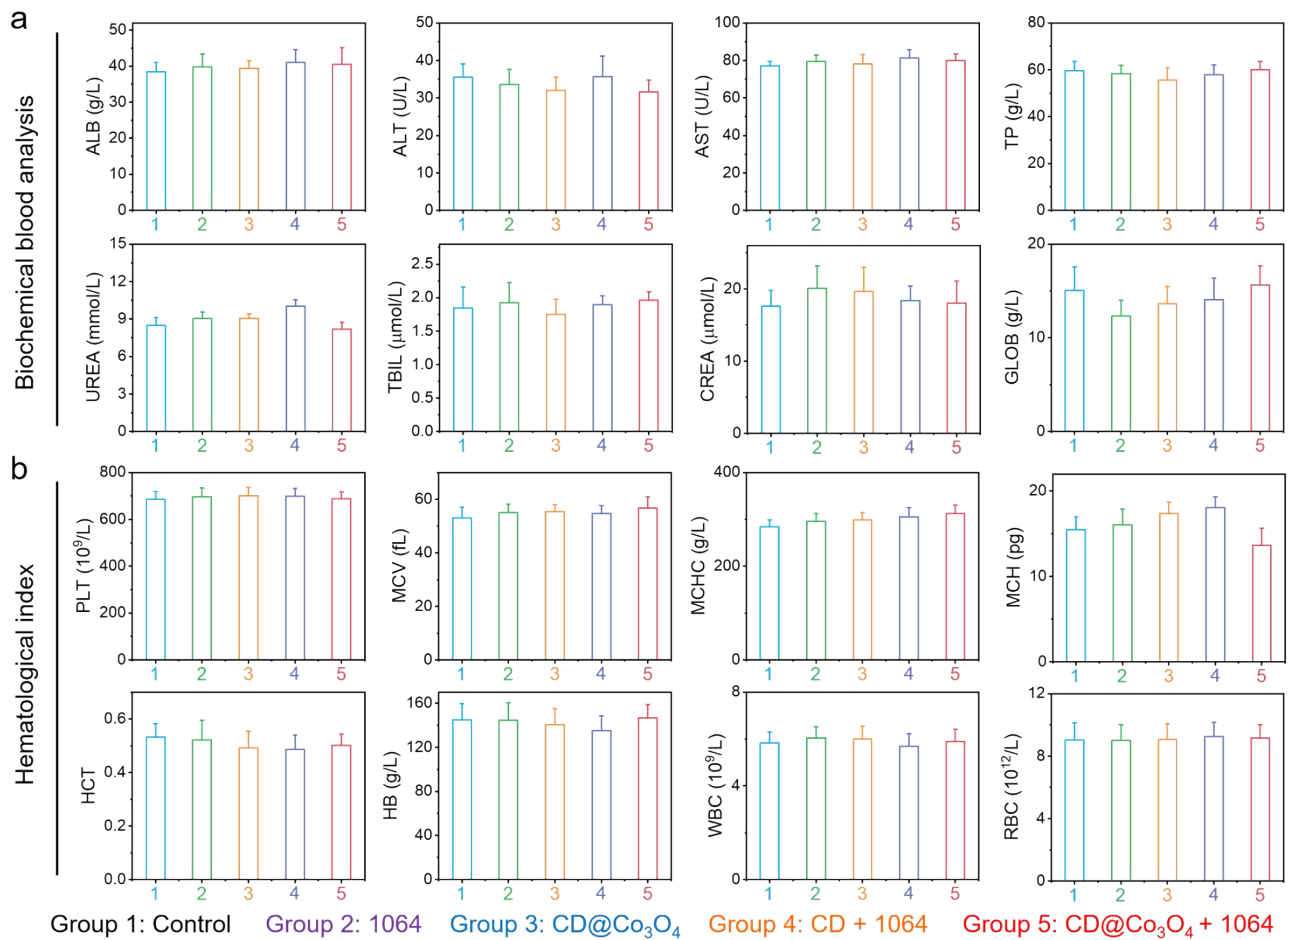

**Figure S20.** (a-b) Biochemical blood analysis (a) and hematological index (b) of the mice that were sacrificed at 18 days after different treatments. The terms of biochemical blood analysis include ALB, ALT, AST, TP, UREA, TBIL, CREA, and GLOB. The terms of hematological index include PLT, MCV, MCHC, MCH, HCT, Hb, WBC, and RBC.
